# Supplementary material for: First Toxicological Analysis of the Pufferfish Sphoeroides Pach-Ygaster Collected in the Italian Waters (Strait of Sicily): Role of the Citizens Sciences in Monitoring Toxic Marine Species
Source: Preprints.org preprint supplement (doi:10.20944/preprints202305.0474.v1), 2023-05-08
Supplement: Supplementary file 1 [file supplementary]

Figure S1: Informative brochure distribute to the fishermen.

# Opuscolo informativo

- Materiale illustrativo a disposizione degli operatori del mare contenente indicazioni per il riconoscimento visivo delle specie ittiche invasive con particolare attenzione alle specie potenzialmente tossiche per la salute umana.

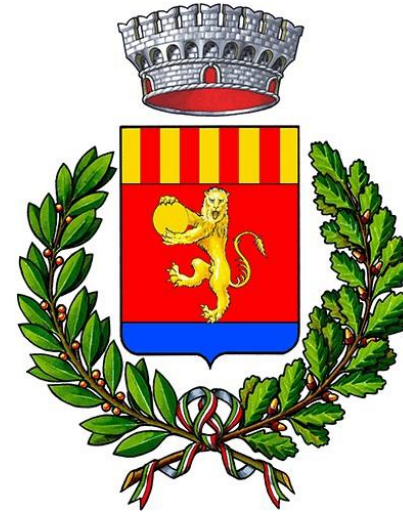

**FISH LAB**  
DIPARTIMENTO DI SCIENZE VETERINARIE - UNIVERSITÀ DI PISA

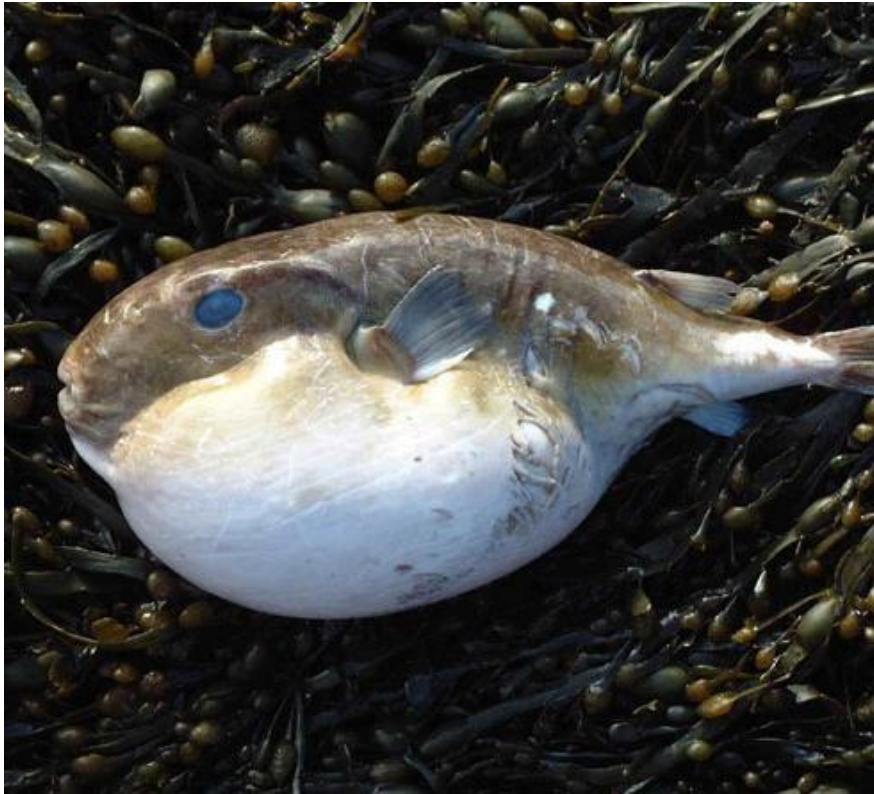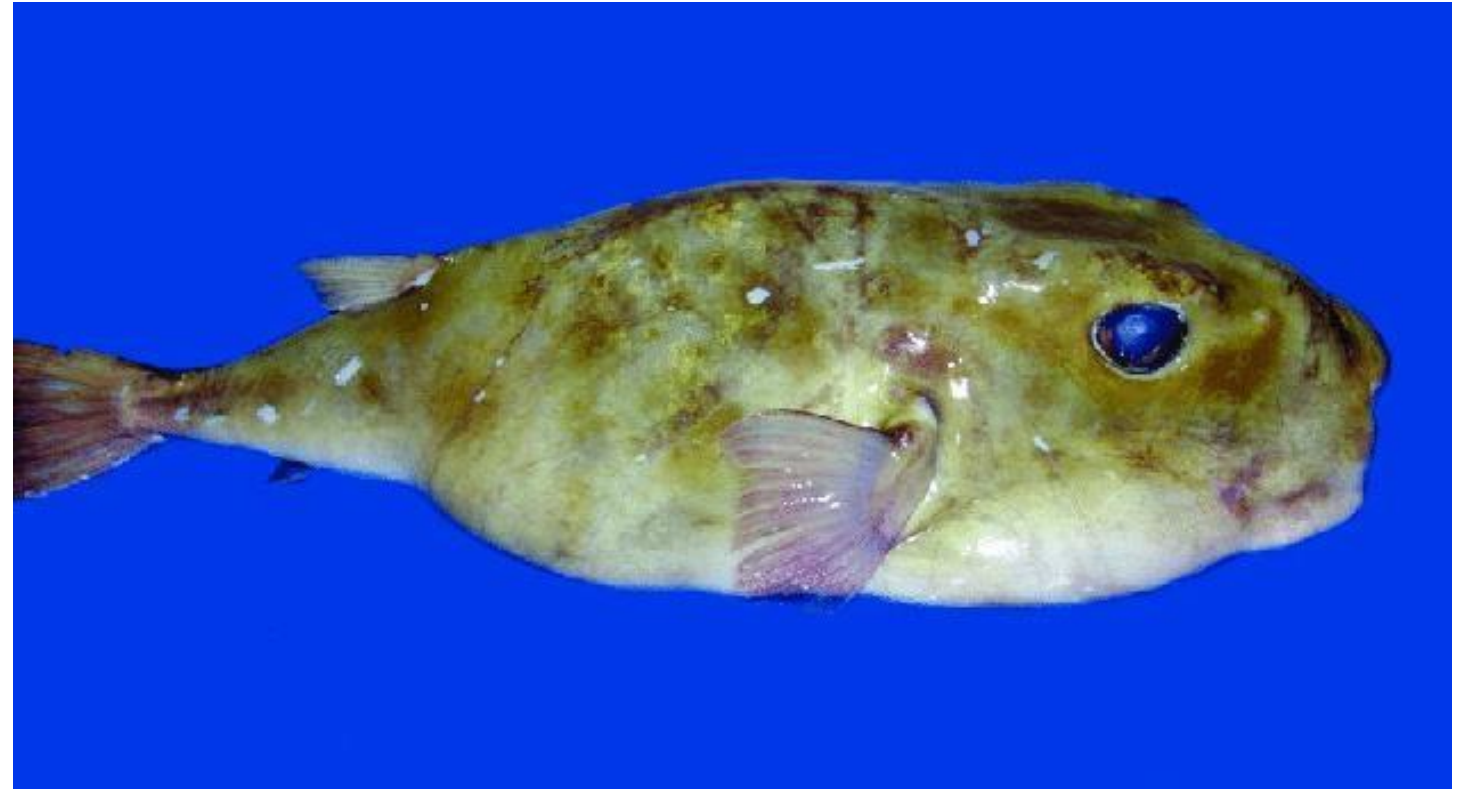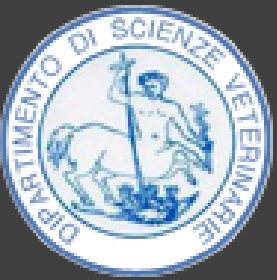

## *Sphoeroides pachygaster*

- Ha il caratteristico aspetto dei pesci palla, con corpo tozzo, gonfiabile, pinne dorsale ed anale brevi ed arretrate, testa ed occhi grandi, bocca dotata di 4 grossi denti. La pinna caudale ha margine dritto. le pinne ventrali sono assenti mentre le pinne pettorali sono ampie.
- Il colore è bruno sul dorso ed argenteo su fianchi e ventre.
- Raggiunge i 25 cm di lunghezza, le femmine sono più grandi dei maschi.

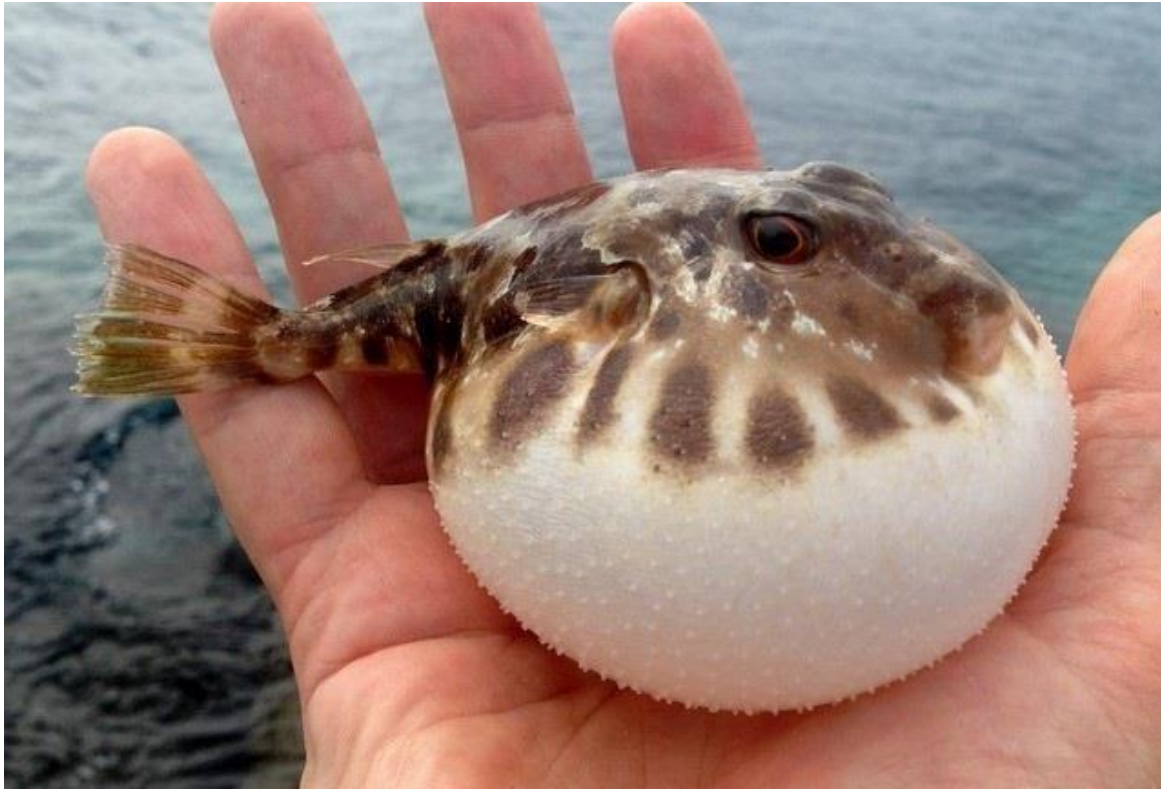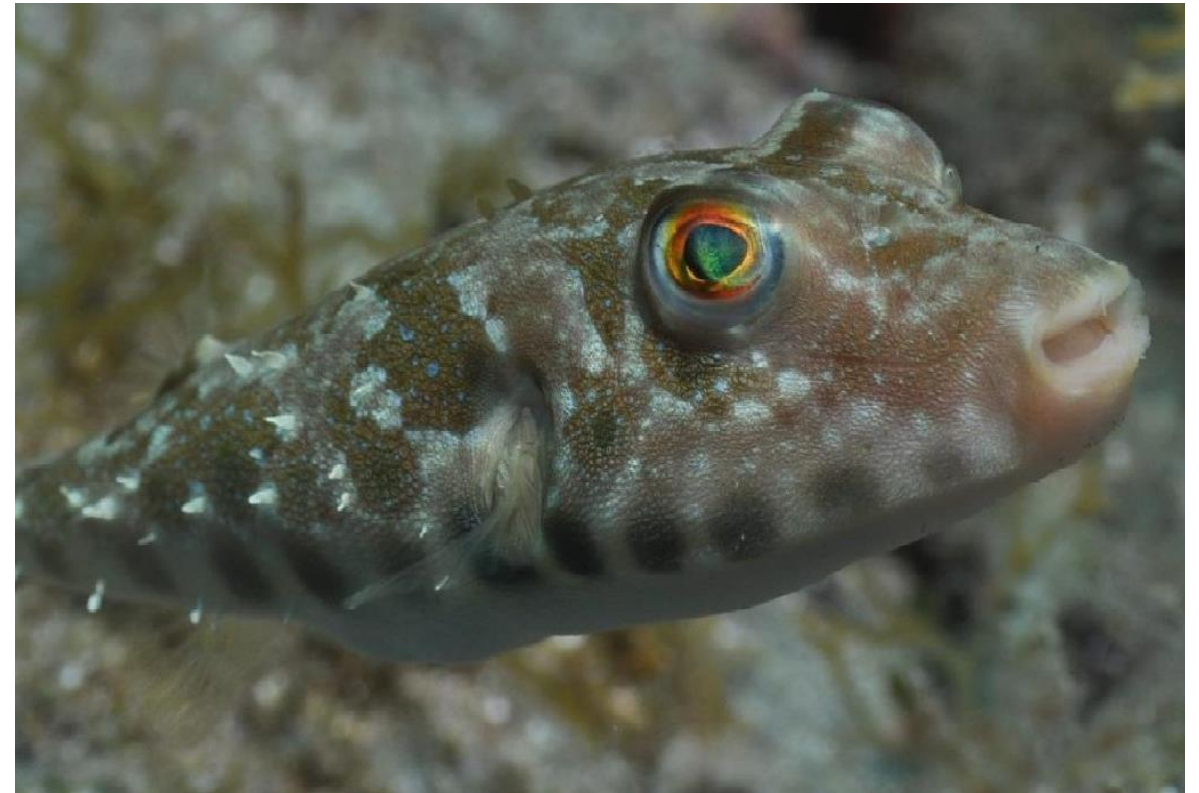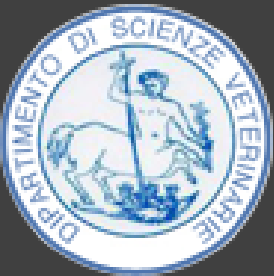

## *Sphoeroides marmoratus*

- Corpo gonfiabile. Narici all'estremità di un'appendice ovale. Pinna caudale arrotondata, dorsale, anale e pettorali biancastre quasi trasparenti
- Il corpo si presenta di colore verde-grigio marroncino, con ventre bianco e provvisto di spine. Sul dorso sono presenti una serie di macchie scure ed un paio di lembi neri sulla superficie medio-dorsale del corpo.
- Pesce di piccola taglia.



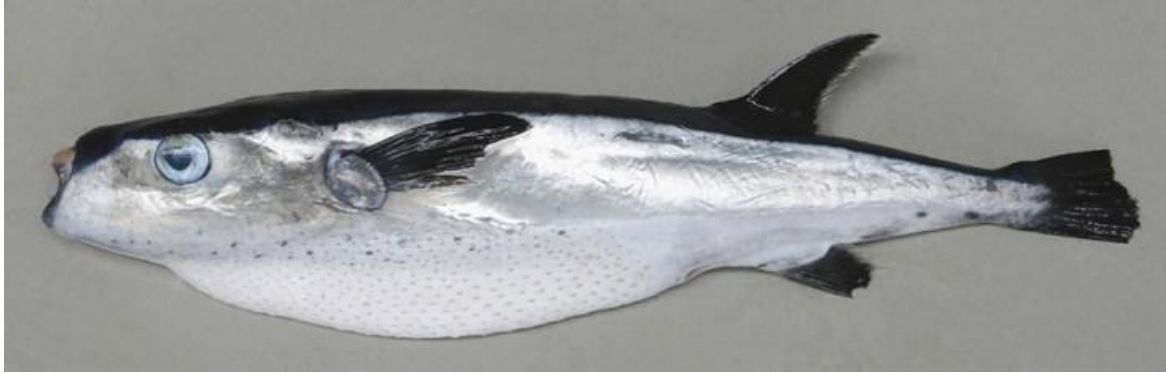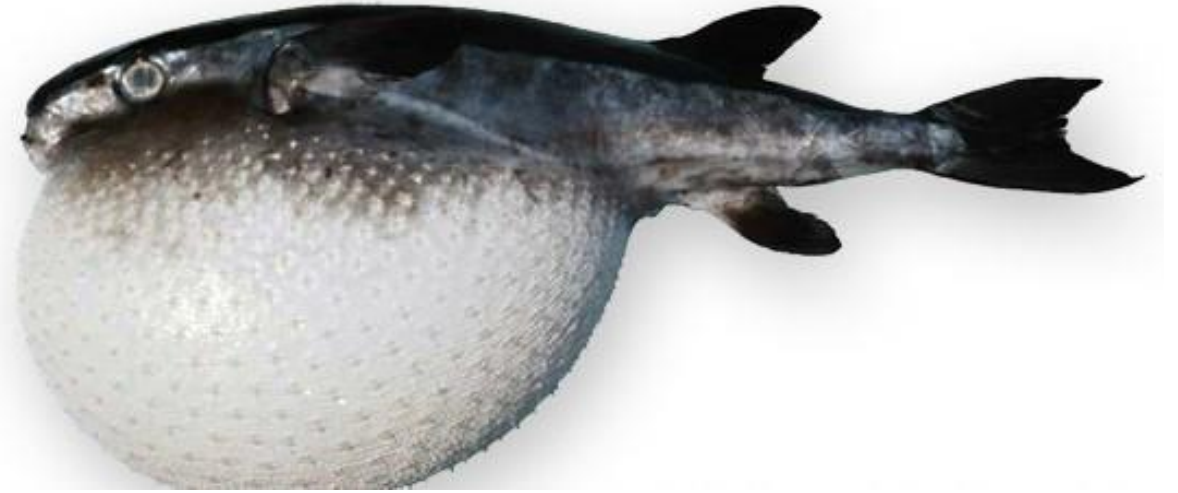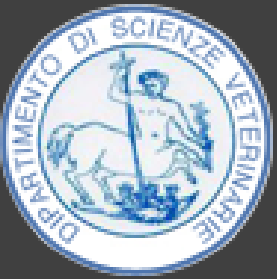

## *Lagocephalus lagocephalus*

- La livrea è caratteristica ed è il miglior criterio per distinguerlo da specie affini, il dorso è infatti di colore blu senza macchie, i fianchi argentei presentano due bande laterali ed il ventre è bianco.
- Le pinne pettorali dorsali ed anali sono scure posizionate lontane e posteriormente.
- Il corpo, nel complesso, può raggiungere i 65 cm, peso massimo registrato 3,2 kg

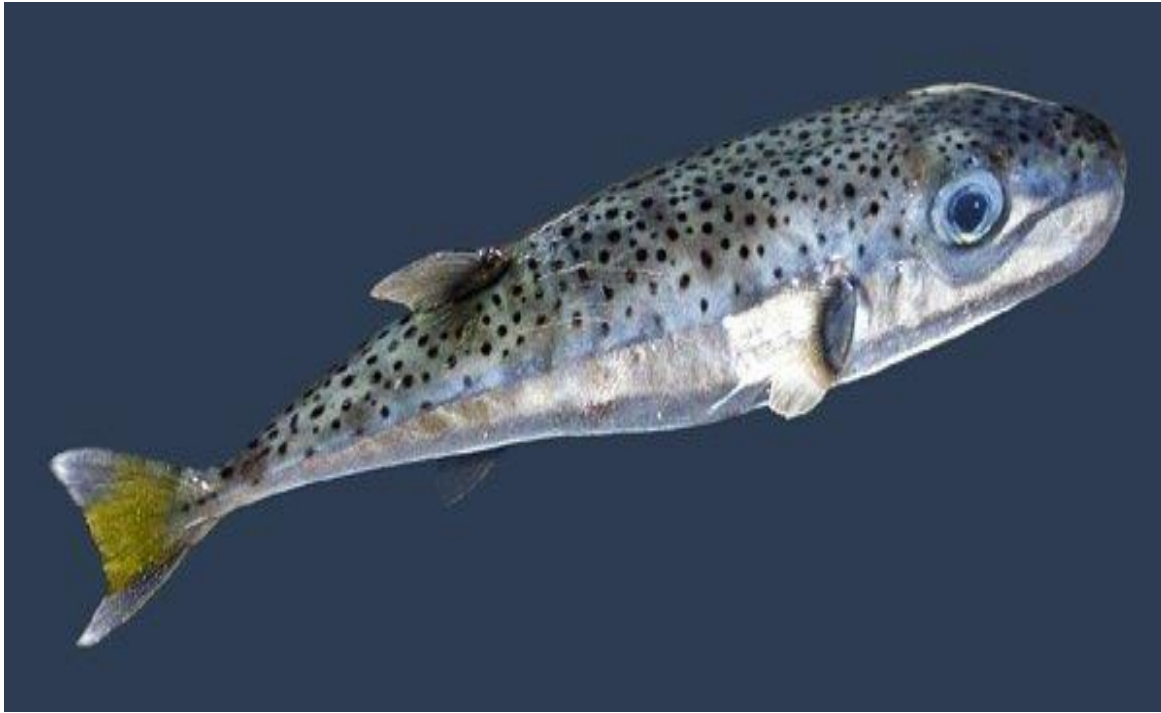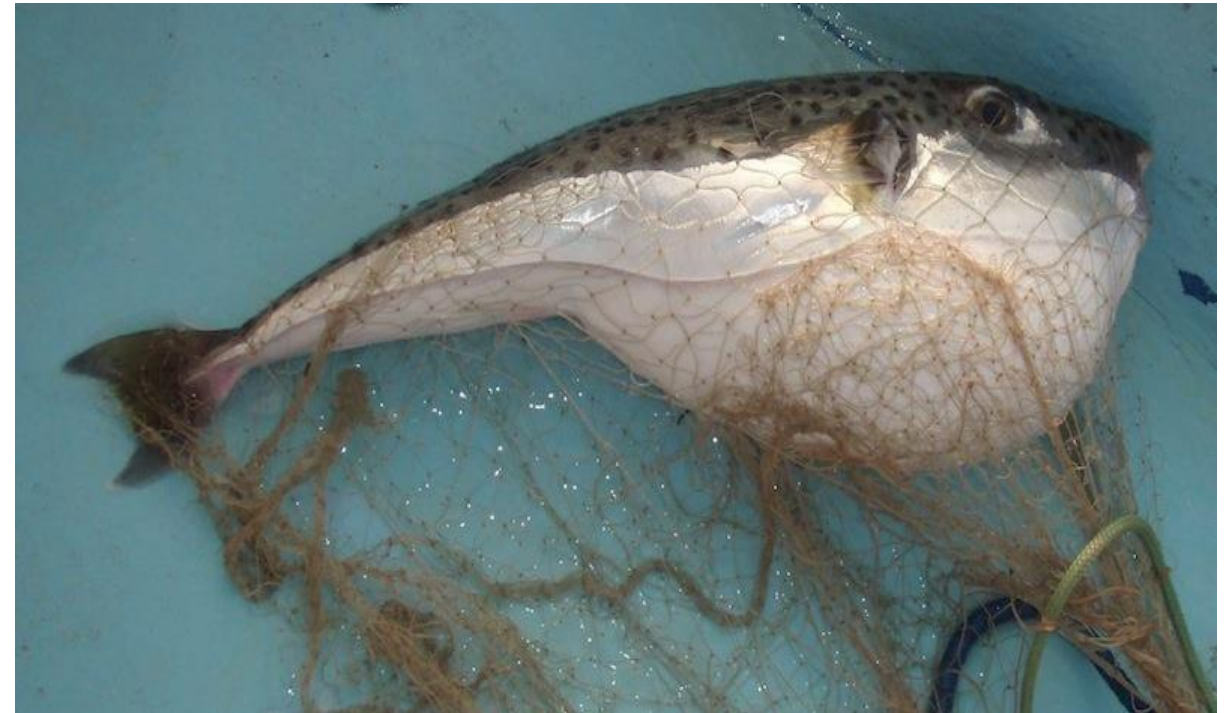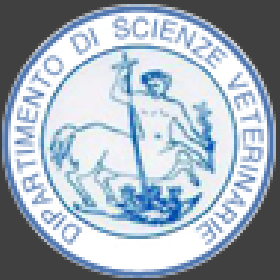

## *Lagocephalus sceleratus*

- Il pesce palla maculato è il più tossico ed invasivo dei pesci palla .
- Può raggiungere 110 cm di lunghezza e 7 kg di peso.
- Ha un corpo allungato e compresso ai lati. Non presenta squame, ma possiede delle piccole spinule sul ventre e sulla superficie dorsale. Le pinne dorsale e anale si trovano in posizione posteriore.
- Il dorso è verdastro con macchie regolari marrone scuro o nere, lungo i fianchi dalla bocca alla pinna caudale è ben visibile una banda argentea; il ventre è bianco. È infine evidente una macchia argentea davanti all'occhio.

dell'operatore del mare, come specie invasiva/aliena/tropicale.

- Il Dipartimento di Scienze Veterinarie dell'università di Pisa in collaborazione con il comune di Lampedusa e Linosa ringraziano tutti coloro che prenderanno parte alle attività di monitoraggio delle specie ittiche invasive potenzialmente tossiche per la salute umana al fine di contribuire, fornendo informazioni essenziali, all'analisi dell'evoluzione faunistica del Mar Mediterraneo a seguito dei cambiamenti climatici.

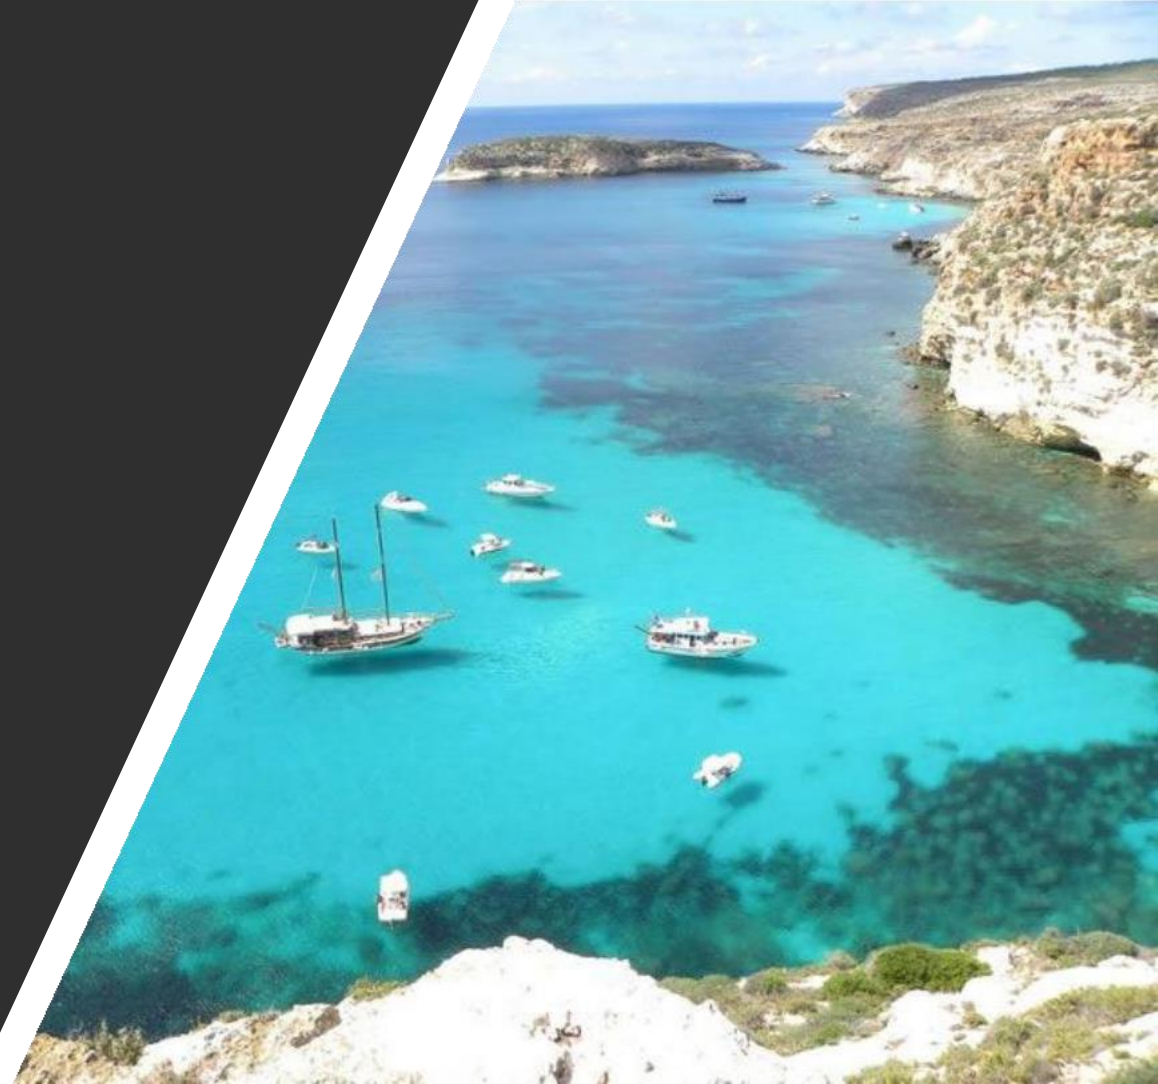

**Table S1.** HILIC-MS/MS set of employed parameters

1) UPLC LC gradient condition (run time: 11 min)

| Time    | Flow Rate<br>(mL/min) | % A1 | % B1 | Max. Pressure Limit (bar) |
|---------|-----------------------|------|------|---------------------------|
| Initial | 0.400                 | 2.0  | 98.0 | 1200.00                   |
| 4.00    | 0.400                 | 2.0  | 98.0 | 1200.00                   |
| 7.50    | 0.400                 | 50.0 | 50.0 | 1200.00                   |
| 9.00    | 0.500                 | 50.0 | 50.0 | 1200.00                   |
| 9.50    | 0.500                 | 5.0  | 98.0 | 1200.00                   |
| 10.0    | 0.800                 | 2.0  | 98.0 | 1200.00                   |
| 10.60   | 0.800                 | 2.0  | 98.0 | 1200.00                   |
| 10.61   | 0.400                 | 2.0  | 98.0 | 1200.00                   |
| 11.00   | 0.400                 | 2.0  | 98.0 | 1200.00                   |

2) XEVO TQ-XS CONDITIONS

| Parameter                    | Positive Ionisation ESI+ |
|------------------------------|--------------------------|
| Capillary Voltage (kV)       | 3.0                      |
| Cone voltage (V)             | 20                       |
| Source temperature (°C)      | 150                      |
| Desolvation Temperature (°C) | 500                      |
| Cone Gas Flow (L/Hr)         | 150                      |
| Desolvation Gas Flow (L/Hr)  | 1000                     |
| Collision gas flow (ml/Min)  | 0.15                     |
| Nebuliser Gas flow (Bar)     | 7                        |

3) Transition XEVO TQ XS MS/MS (MRM)

| Analogue | Precursor Ion | Product Ion | Collision Energy | Cone | Polarity |
|----------|---------------|-------------|------------------|------|----------|
| TTX      | 320,1         | 302,1       | 25               | 40   | Positive |
| TTX      | 320,1         | 162,1       | 38               | 40   | Positive |



**Table S2.** Details of captures, fishermen (Fm) and specimens collected per area.

| Areas    | N° of capture | Date of catch | N° of specimens collected per capture | Fishermen | Total N° of specimens per area |
|----------|---------------|---------------|---------------------------------------|-----------|--------------------------------|
| <b>A</b> | <b>4</b>      | 02/09/2020    | 4                                     | Fm5       | <b>16</b>                      |
|          |               | 30/01/21      | 5                                     | Fm5       |                                |
|          |               | 08/02/21      | 5                                     | Fm5       |                                |
|          |               | 14/04/21      | 2                                     | Fm5       |                                |
| <b>B</b> | <b>1</b>      | 05/05/20      | 2                                     | Fm2       | <b>2</b>                       |
| <b>C</b> | <b>1</b>      | 29/02/20      | 2                                     | Fm2       | <b>2</b>                       |
| <b>D</b> | <b>2</b>      | 21/05/20      | 4                                     | Fm1       | <b>6</b>                       |
|          |               | 29/05/20      | 2                                     | Fm4       |                                |
| <b>E</b> | <b>6</b>      | 18/02/20      | 1                                     | Fm1       | <b>25</b>                      |
|          |               | 13/03/20      | 3                                     | Fm1       |                                |
|          |               | 04/06/20      | 3                                     | Fm2       |                                |
|          |               | 01/07/20      | 12                                    | Fm5       |                                |
|          |               | 04/08/20      | 3                                     | Fm5       |                                |
|          |               | 20/08/20      | 3                                     | Fm4       |                                |
| <b>F</b> | <b>2</b>      | 11/04/20      | 3                                     | Fm3       | <b>5</b>                       |
|          |               | 14/05/21      | 2                                     | Fm1       |                                |

**Table S3.** Fisherman (Fm), catch date, number of specimens caught, GPS coordinates with relative depth, type of seabed, temperature and salinity.

| Fisherman | Catch date | N° of specimens | GPS coordinate                              | Depth (m) | Type of seabed          | T bottom level (°C) | Salinity (‰) |
|-----------|------------|-----------------|---------------------------------------------|-----------|-------------------------|---------------------|--------------|
| Fm1       | 18/02/20   | 1               | lat 35° 34' 8,35"<br>N/long 12° 15' 45,8" E | 69        | Medium sand or sand     | 15                  | 37.7         |
| Fm2       | 29/02/20   | 2               | lat 35° 00' 9,30"<br>N/long 13°04' 21,0" E  | 83        | Fine sand or silty sand | 15.6                | 37.9         |
| Fm1       | 13/03/20   | 3               | lat 35° 32' 9,84"<br>N/long 12° 21' 47,2" E | 78        | Medium sand or sand     | 15                  | 38.1         |
| Fm3       | 11/04/20   | 3               | lat 35° 35' 50,0"<br>N/long 12° 32' 00" E   | 82        | Fine sand or silty sand | 15                  | 38           |
| Fm2       | 05/05/20   | 2               | lat 35° 14' 54,0"<br>N/long 12° 49' 39,0" E | 16        | Medium sand             | 16.5                | 37.7         |
| Fm1       | 21/05/20   | 4               | lat 35° 21' 9,06"<br>N/long 12° 42' 7,87" E | 48        | Medium sand or sand     | 16.6                | 37.7         |
| Fm4       | 29/05/20   | 2               | lat 35° 26' 38,0"<br>N/long 12° 40' 36,0" E | 31        | Medium sand or sand     | 17.6                | 38           |
| Fm2       | 04/06/20   | 3               | lat 35° 30' 8,60"<br>N/long 12° 21' 31,0" E | 69        | Medium sand or sand     | 15.9                | 37.8         |
| Fm5       | 01/07/20   | 12              | lat 35° 29' 8,75" N/<br>long 12° 58' 8,50"  | 121       | Fine sand or silty sand | 15.8                | 38.2         |
| Fm5       | 04/08/20   | 3               | lat 35° 29' 8,77" N/<br>long 12°58' 8,00" E | 122       | Fine sand or silty sand | 15.6                | 36           |
| Fm4       | 20/08/20   | 3               | lat 35° 27' 4,00" N/<br>long 12°10' 38,0" E | 72        | Medium sand or sand     | 16.3                | 36           |
| Fm5       | 02/09/20   | 4               | lat 35° 29' 8,00"<br>N/long 12° 58' 8,00" E | 122       | Fine sand or silty sand | 15.8                | 38.1         |
| Fm5       | 30/01/21   | 5               | lat 35° 29' 7,50"<br>N/long 12°57'6,10" E   | 139       | Fine sand or silty sand | 15.5                | 38.5         |

|     |          |   |                                                   |     |                                  |      |      |
|-----|----------|---|---------------------------------------------------|-----|----------------------------------|------|------|
| Fm5 | 08/02/21 | 5 | lat 35° 28' 50,0''<br>N/long 12° 56'<br>40,0'' E  | 170 | Fine<br>sand or<br>silty<br>sand | 15.3 | 38.6 |
| Fm5 | 14/04/21 | 2 | lat 35° 28' 36,5''<br>N/long 12° 56'<br>44,8''    | 160 | Fine<br>sand or<br>silty<br>sand | 15.3 | 38.6 |
| Fm1 | 14/05/21 | 2 | lat 35° 42' 58,3'' N/<br>long 12° 29' 18,6''<br>E | 166 | Fine<br>sand or<br>silty<br>sand | 15.3 | 38.7 |
